# Supplementary material
Source: publisher site journal article supplement (https://www.dovepress.com/article/484957)
Supplement: Supplementary file 1 [file get_supplementary_file.php]

Acne Questionnaire

1. Gender: ①male ②female
2. Race：①Han nationality ②minority
3. Age：＿＿＿＿
4. Are you married？①yes ②no
5. What is your level of education？
   1. Illiteracy ②primary school ③junior high school ④senior high school
6. bachelor degree ⑥master degree ⑦PhD
7. At what age did your acne begin? ＿＿＿＿
8. Do you have heavy stress? ①yes ②no
9. Do you have wrong methods of skin caring?（e.g, changing cosmetics frequently，using greasy skin caring products）①yes ②no
10. Do other family members have acne？①yes ②no
11. Do you stay up late frequently？（more than 3 days per week）①yes ②no
12. Are you overtired？①yes ②no
13. Do you make up？（more than 3 days per week）①yes ②no
14. Have you changed your life environment in the last year？（e.g, moving to another city）①yes ②no
15. Do you use electronic products？①yes ②no
16. Which type of food do you often eat？（more than twice per week）
    1. Greasy food ②High-temp food ③Dairy products ④Spicy food

⑤Sweety food ⑥Seafood

1. Have you received any medication treatment for your acne? ①yes ②no
2. What oral medication have you tried for your acne?（If question 16 choose ‘no’, don’t answer this question.）
   1. antibiotics (doxycycline, minocycline) ②isotretinoin ③hormones ④anti-androgens ⑤none
3. What topical medication have you tried for your acne?
   1. antibiotic ointment（clindamycin, erythromycin） ②tretinoin ③adapalene ④benzoyl peroxide ⑤sulfur ⑥none
4. What type of non-drug treatment of physiotherapy have you tried？
   1. chemical peel ②laser ③Photodynamic ④red-bule light ⑤none
5. Please describe the types of lesion by doctor（multiple choice available）.
   1. blackheads ②papules ③pustules ④cyst/nodules ⑤trophic scar
6. hypertrophic ⑦scar
7. Please describe the acne-involved body sites by doctor（multiple choice available）.
   1. face ②neck ③chest ④back
8. Severity of acne (by doctor).
   1. I ②II ③III ④IV
